# Supplementary material for: Electrophysiological Comparison of Cumulative Area and Non-Symbolic Number Judgments
Source: MDPI journal article supplement (doi:10.3390/brainsci13060975), 2023-06-20
Supplement: s1 [file s1]

### Stimuli Specifications

**Table S1**

*Specific cumulative area (CA), number, and average size (Avg. Size) dimensions of stimuli in each trial type*

|                                      | Trial Type                   | Number, 2.00 Ratio, Congruent | Number, 2.00 Ratio, Neutral | Number, 2.00 Ratio, Incongruent | Number, 1.25 Ratio, Congruent | Number, 1.25 Ratio, Neutral | Number, 1.25 Ratio, Incongruent |
|--------------------------------------|------------------------------|-------------------------------|-----------------------------|---------------------------------|-------------------------------|-----------------------------|---------------------------------|
| Stimulus Greater in Target Magnitude | CA (cm <sup>2</sup> )        | 20.6                          | 15.45                       | 10.3                            | 17.2                          | 15.45                       | 13.7                            |
|                                      | Number                       | 24                            | 24                          | 24                              | 20                            | 20                          | 20                              |
|                                      | Avg. Size (cm <sup>2</sup> ) | 0.86                          | 0.64                        | 0.43                            | 0.86                          | 0.77                        | 0.69                            |
| Stimulus Lesser in Target Magnitude  | CA (cm <sup>2</sup> )        | 10.3                          | 15.45                       | 20.6                            | 13.7                          | 15.45                       | 17.2                            |
|                                      | Number                       | 12                            | 12                          | 12                              | 16                            | 16                          | 16                              |
|                                      | Avg. Size (cm <sup>2</sup> ) | 0.86                          | 1.29                        | 1.72                            | 0.86                          | 0.97                        | 1.08                            |
|                                      | Trial Type                   | CA, 2.00 Ratio, Congruent     | CA, 2.00 Ratio, Neutral     | CA, 2.00 Ratio, Incongruent     | CA, 1.25 Ratio, Congruent     | CA, 1.25 Ratio, Neutral     | CA, 1.25 Ratio, Incongruent     |
| Stimulus Greater in Target Magnitude | CA (cm <sup>2</sup> )        | 20.6                          | 20.6                        | 20.6                            | 17.2                          | 17.2                        | 17.2                            |
|                                      | Number                       | 24                            | 18                          | 12                              | 20                            | 18                          | 16                              |
|                                      | Avg. Size (cm <sup>2</sup> ) | 0.86                          | 1.14                        | 1.72                            | 0.86                          | 0.96                        | 1.08                            |
| Stimulus Lesser in Target Magnitude  | CA (cm <sup>2</sup> )        | 10.3                          | 10.3                        | 10.3                            | 13.7                          | 13.7                        | 13.7                            |
|                                      | Number                       | 12                            | 18                          | 24                              | 16                            | 18                          | 20                              |
|                                      | Avg. Size (cm <sup>2</sup> ) | 0.86                          | 0.57                        | 0.43                            | 0.86                          | 0.76                        | 0.69                            |

**ERP Waveform Results****P100****Table S2**

*Main effects and interactions observed in linear mixed model predicting mean amplitude.*

| <b>Effect</b>                       | <b>Sum Sq</b> | <b>Mean Sq</b> | <b>NumDF</b> | <b>DenDF</b> | <b>F value</b> | <b>Pr(&gt;F)</b> | <b>cohensf</b> |
|-------------------------------------|---------------|----------------|--------------|--------------|----------------|------------------|----------------|
| Magnitude                           | 0.70          | 0.70           | 1.00         | 100587.74    | 0.01           | 0.917            | 0.000          |
| Ratio                               | 1060.91       | 1060.91        | 1.00         | 100590.69    | 16.34          | 0.000            | 0.013          |
| Congruity                           | 1355.22       | 677.61         | 2.00         | 100586.44    | 10.43          | 0.000            | 0.014          |
| pair                                | 113421.80     | 22684.36       | 5.00         | 100584.10    | 349.28         | 0.000            | 0.132          |
| hemi                                | 2338.91       | 2338.91        | 1.00         | 100584.10    | 36.01          | 0.000            | 0.019          |
| Magnitude:Ratio                     | 100.69        | 100.69         | 1.00         | 100586.90    | 1.55           | 0.213            | 0.004          |
| Magnitude:Congruity                 | 1295.33       | 647.67         | 2.00         | 100586.13    | 9.97           | 0.000            | 0.014          |
| Ratio:Congruity                     | 469.05        | 234.52         | 2.00         | 100588.25    | 3.61           | 0.027            | 0.008          |
| Magnitude:pair                      | 37.13         | 7.43           | 5.00         | 100584.10    | 0.11           | 0.989            | 0.002          |
| Ratio:pair                          | 227.53        | 45.51          | 5.00         | 100584.10    | 0.70           | 0.623            | 0.006          |
| Congruity:pair                      | 234.75        | 23.47          | 10.00        | 100584.10    | 0.36           | 0.963            | 0.006          |
| Magnitude:hemi                      | 28.38         | 28.38          | 1.00         | 100584.10    | 0.44           | 0.509            | 0.002          |
| Ratio:hemi                          | 13.67         | 13.67          | 1.00         | 100584.10    | 0.21           | 0.646            | 0.001          |
| Congruity:hemi                      | 220.38        | 110.19         | 2.00         | 100584.10    | 1.70           | 0.183            | 0.006          |
| pair:hemi                           | 13617.79      | 2723.56        | 5.00         | 100584.10    | 41.94          | 0.000            | 0.046          |
| Magnitude:Ratio:Congruity           | 1803.21       | 901.60         | 2.00         | 100587.28    | 13.88          | 0.000            | 0.017          |
| Magnitude:Ratio:pair                | 54.41         | 10.88          | 5.00         | 100584.10    | 0.17           | 0.975            | 0.003          |
| Magnitude:Congruity:pair            | 219.86        | 21.99          | 10.00        | 100584.10    | 0.34           | 0.971            | 0.006          |
| Ratio:Congruity:pair                | 136.43        | 13.64          | 10.00        | 100584.10    | 0.21           | 0.996            | 0.005          |
| Magnitude:Ratio:hemi                | 6.35          | 6.35           | 1.00         | 100584.10    | 0.10           | 0.755            | 0.001          |
| Magnitude:Congruity:hemi            | 90.83         | 45.42          | 2.00         | 100584.10    | 0.70           | 0.497            | 0.004          |
| Ratio:Congruity:hemi                | 46.64         | 23.32          | 2.00         | 100584.10    | 0.36           | 0.698            | 0.003          |
| Magnitude:pair:hemi                 | 68.27         | 13.65          | 5.00         | 100584.10    | 0.21           | 0.958            | 0.003          |
| Ratio:pair:hemi                     | 13.49         | 2.70           | 5.00         | 100584.10    | 0.04           | 0.999            | 0.001          |
| Congruity:pair:hemi                 | 139.37        | 13.94          | 10.00        | 100584.10    | 0.21           | 0.995            | 0.005          |
| Magnitude:Ratio:Congruity:pair      | 694.52        | 69.45          | 10.00        | 100584.10    | 1.07           | 0.382            | 0.010          |
| Magnitude:Ratio:Congruity:hemi      | 36.09         | 18.04          | 2.00         | 100584.10    | 0.28           | 0.757            | 0.002          |
| Magnitude:Ratio:pair:hemi           | 10.29         | 2.06           | 5.00         | 100584.10    | 0.03           | 0.999            | 0.001          |
| Magnitude:Congruity:pair:hemi       | 80.13         | 8.01           | 10.00        | 100584.10    | 0.12           | 1.000            | 0.004          |
| Ratio:Congruity:pair:hemi           | 20.83         | 2.08           | 10.00        | 100584.10    | 0.03           | 1.000            | 0.002          |
| Magnitude:Ratio:Congruity:pair:hemi | 66.77         | 6.68           | 10.00        | 100584.10    | 0.10           | 1.000            | 0.003          |

**N100****Table S3**

*Main effects and interactions observed in linear mixed model predicting mean amplitude.*

| <b>Effect</b>                       | <b>Sum Sq</b> | <b>Mean Sq</b> | <b>NumDF</b> | <b>DenDF</b> | <b>F value</b> | <b>Pr(&gt;F)</b> | <b>cohensf</b> |
|-------------------------------------|---------------|----------------|--------------|--------------|----------------|------------------|----------------|
| Magnitude                           | 281.68        | 281.68         | 1.00         | 100585.96    | 3.40           | 0.065            | 0.006          |
| Ratio                               | 74.28         | 74.28          | 1.00         | 100587.60    | 0.90           | 0.344            | 0.003          |
| Congruity                           | 1900.27       | 950.14         | 2.00         | 100585.23    | 11.46          | 0.000            | 0.015          |
| pair                                | 20018.90      | 4003.78        | 5.00         | 100583.98    | 48.28          | 0.000            | 0.049          |
| hemi                                | 334.81        | 334.81         | 1.00         | 100583.98    | 4.04           | 0.045            | 0.006          |
| Magnitude:Ratio                     | 16.00         | 16.00          | 1.00         | 100585.49    | 0.19           | 0.661            | 0.001          |
| Magnitude:Congruity                 | 3938.73       | 1969.36        | 2.00         | 100585.07    | 23.75          | 0.000            | 0.022          |
| Ratio:Congruity                     | 629.99        | 314.99         | 2.00         | 100586.28    | 3.80           | 0.022            | 0.009          |
| Magnitude:pair                      | 244.29        | 48.86          | 5.00         | 100583.98    | 0.59           | 0.708            | 0.005          |
| Ratio:pair                          | 44.37         | 8.87           | 5.00         | 100583.98    | 0.11           | 0.991            | 0.002          |
| Congruity:pair                      | 817.31        | 81.73          | 10.00        | 100583.98    | 0.99           | 0.453            | 0.010          |
| Magnitude:hemi                      | 13.38         | 13.38          | 1.00         | 100583.98    | 0.16           | 0.688            | 0.001          |
| Ratio:hemi                          | 15.79         | 15.79          | 1.00         | 100583.98    | 0.19           | 0.663            | 0.001          |
| Congruity:hemi                      | 12.72         | 6.36           | 2.00         | 100583.98    | 0.08           | 0.926            | 0.001          |
| pair:hemi                           | 1466.64       | 293.33         | 5.00         | 100583.98    | 3.54           | 0.003            | 0.013          |
| Magnitude:Ratio:Congruity           | 319.40        | 159.70         | 2.00         | 100585.72    | 1.93           | 0.146            | 0.006          |
| Magnitude:Ratio:pair                | 78.52         | 15.70          | 5.00         | 100583.98    | 0.19           | 0.967            | 0.003          |
| Magnitude:Congruity:pair            | 461.46        | 46.15          | 10.00        | 100583.98    | 0.56           | 0.850            | 0.007          |
| Ratio:Congruity:pair                | 723.42        | 72.34          | 10.00        | 100583.98    | 0.87           | 0.559            | 0.009          |
| Magnitude:Ratio:hemi                | 2.12          | 2.12           | 1.00         | 100583.98    | 0.03           | 0.873            | 0.001          |
| Magnitude:Congruity:hemi            | 13.66         | 6.83           | 2.00         | 100583.98    | 0.08           | 0.921            | 0.001          |
| Ratio:Congruity:hemi                | 75.10         | 37.55          | 2.00         | 100583.98    | 0.45           | 0.636            | 0.003          |
| Magnitude:pair:hemi                 | 13.71         | 2.74           | 5.00         | 100583.98    | 0.03           | 0.999            | 0.001          |
| Ratio:pair:hemi                     | 21.39         | 4.28           | 5.00         | 100583.98    | 0.05           | 0.998            | 0.002          |
| Congruity:pair:hemi                 | 102.30        | 10.23          | 10.00        | 100583.98    | 0.12           | 1.000            | 0.004          |
| Magnitude:Ratio:Congruity:pair      | 227.17        | 22.72          | 10.00        | 100583.98    | 0.27           | 0.987            | 0.005          |
| Magnitude:Ratio:Congruity:hemi      | 83.94         | 41.97          | 2.00         | 100583.98    | 0.51           | 0.603            | 0.003          |
| Magnitude:Ratio:pair:hemi           | 18.08         | 3.62           | 5.00         | 100583.98    | 0.04           | 0.999            | 0.001          |
| Magnitude:Congruity:pair:hemi       | 84.40         | 8.44           | 10.00        | 100583.98    | 0.10           | 1.000            | 0.003          |
| Ratio:Congruity:pair:hemi           | 31.79         | 3.18           | 10.00        | 100583.98    | 0.04           | 1.000            | 0.002          |
| Magnitude:Ratio:Congruity:pair:hemi | 41.94         | 4.19           | 10.00        | 100583.98    | 0.05           | 1.000            | 0.002          |

**P200****Table S4**

*Main effects and interactions observed in linear mixed model predicting mean amplitude.*

| <b>Effect</b>                       | <b>Sum Sq</b> | <b>Mean Sq</b> | <b>NumDF</b> | <b>DenDF</b> | <b>F value</b> | <b>Pr(&gt;F)</b> | <b>cohensf</b> |
|-------------------------------------|---------------|----------------|--------------|--------------|----------------|------------------|----------------|
| Magnitude                           | 43.46         | 43.46          | 1.00         | 100585.76    | 0.47           | 0.492            | 0.002          |
| Ratio                               | 1480.68       | 1480.68        | 1.00         | 100587.29    | 16.10          | 0.000            | 0.013          |
| Congruity                           | 63.31         | 31.65          | 2.00         | 100585.08    | 0.34           | 0.709            | 0.003          |
| pair                                | 43850.66      | 8770.13        | 5.00         | 100583.92    | 95.35          | 0.000            | 0.069          |
| hemi                                | 1212.64       | 1212.64        | 1.00         | 100583.92    | 13.18          | 0.000            | 0.011          |
| Magnitude:Ratio                     | 123.94        | 123.94         | 1.00         | 100585.32    | 1.35           | 0.246            | 0.004          |
| Magnitude:Congruity                 | 2377.81       | 1188.91        | 2.00         | 100584.93    | 12.93          | 0.000            | 0.016          |
| Ratio:Congruity                     | 1235.76       | 617.88         | 2.00         | 100586.07    | 6.72           | 0.001            | 0.012          |
| Magnitude:pair                      | 279.45        | 55.89          | 5.00         | 100583.92    | 0.61           | 0.694            | 0.005          |
| Ratio:pair                          | 1309.22       | 261.84         | 5.00         | 100583.92    | 2.85           | 0.014            | 0.012          |
| Congruity:pair                      | 1756.51       | 175.65         | 10.00        | 100583.92    | 1.91           | 0.039            | 0.014          |
| Magnitude:hemi                      | 0.01          | 0.01           | 1.00         | 100583.92    | 0.00           | 0.990            | 0.000          |
| Ratio:hemi                          | 7.95          | 7.95           | 1.00         | 100583.92    | 0.09           | 0.769            | 0.001          |
| Congruity:hemi                      | 7.35          | 3.67           | 2.00         | 100583.92    | 0.04           | 0.961            | 0.001          |
| pair:hemi                           | 5272.49       | 1054.50        | 5.00         | 100583.92    | 11.46          | 0.000            | 0.024          |
| Magnitude:Ratio:Congruity           | 99.66         | 49.83          | 2.00         | 100585.54    | 0.54           | 0.582            | 0.003          |
| Magnitude:Ratio:pair                | 107.79        | 21.56          | 5.00         | 100583.92    | 0.23           | 0.948            | 0.003          |
| Magnitude:Congruity:pair            | 442.82        | 44.28          | 10.00        | 100583.92    | 0.48           | 0.903            | 0.007          |
| Ratio:Congruity:pair                | 2130.41       | 213.04         | 10.00        | 100583.92    | 2.32           | 0.010            | 0.015          |
| Magnitude:Ratio:hemi                | 223.23        | 223.23         | 1.00         | 100583.92    | 2.43           | 0.119            | 0.005          |
| Magnitude:Congruity:hemi            | 68.89         | 34.44          | 2.00         | 100583.92    | 0.37           | 0.688            | 0.003          |
| Ratio:Congruity:hemi                | 78.79         | 39.39          | 2.00         | 100583.92    | 0.43           | 0.652            | 0.003          |
| Magnitude:pair:hemi                 | 17.29         | 3.46           | 5.00         | 100583.92    | 0.04           | 0.999            | 0.001          |
| Ratio:pair:hemi                     | 20.30         | 4.06           | 5.00         | 100583.92    | 0.04           | 0.999            | 0.001          |
| Congruity:pair:hemi                 | 89.13         | 8.91           | 10.00        | 100583.92    | 0.10           | 1.000            | 0.003          |
| Magnitude:Ratio:Congruity:pair      | 196.73        | 19.67          | 10.00        | 100583.92    | 0.21           | 0.995            | 0.005          |
| Magnitude:Ratio:Congruity:hemi      | 135.67        | 67.84          | 2.00         | 100583.92    | 0.74           | 0.478            | 0.004          |
| Magnitude:Ratio:pair:hemi           | 47.06         | 9.41           | 5.00         | 100583.92    | 0.10           | 0.992            | 0.002          |
| Magnitude:Congruity:pair:hemi       | 58.18         | 5.82           | 10.00        | 100583.92    | 0.06           | 1.000            | 0.003          |
| Ratio:Congruity:pair:hemi           | 40.67         | 4.07           | 10.00        | 100583.92    | 0.04           | 1.000            | 0.002          |
| Magnitude:Ratio:Congruity:pair:hemi | 71.72         | 7.17           | 10.00        | 100583.92    | 0.08           | 1.000            | 0.003          |

**P300****Table S5**

*Main effects and interactions observed in linear mixed model predicting mean amplitude.*

| Effect                              | Sum Sq    | Mean Sq  | NumDF | DenDF     | F value | Pr(>F) | cohensf |
|-------------------------------------|-----------|----------|-------|-----------|---------|--------|---------|
| Magnitude                           | 886.36    | 886.36   | 1.00  | 100585.42 | 10.76   | 0.001  | 0.010   |
| Ratio                               | 2206.33   | 2206.33  | 1.00  | 100586.59 | 26.78   | 0.000  | 0.016   |
| Congruity                           | 5214.99   | 2607.49  | 2.00  | 100584.90 | 31.65   | 0.000  | 0.025   |
| pair                                | 152745.12 | 30549.02 | 5.00  | 100584.02 | 370.87  | 0.000  | 0.136   |
| hemi                                | 630.01    | 630.01   | 1.00  | 100584.02 | 7.65    | 0.006  | 0.009   |
| Magnitude:Ratio                     | 1975.95   | 1975.95  | 1.00  | 100585.08 | 23.99   | 0.000  | 0.015   |
| Magnitude:Congruity                 | 4301.13   | 2150.57  | 2.00  | 100584.79 | 26.11   | 0.000  | 0.023   |
| Ratio:Congruity                     | 1903.01   | 951.50   | 2.00  | 100585.66 | 11.55   | 0.000  | 0.015   |
| Magnitude:pair                      | 36.52     | 7.30     | 5.00  | 100584.02 | 0.09    | 0.994  | 0.002   |
| Ratio:pair                          | 272.97    | 54.59    | 5.00  | 100584.02 | 0.66    | 0.652  | 0.006   |
| Congruity:pair                      | 203.34    | 20.33    | 10.00 | 100584.02 | 0.25    | 0.991  | 0.005   |
| Magnitude:hemi                      | 65.25     | 65.25    | 1.00  | 100584.02 | 0.79    | 0.373  | 0.003   |
| Ratio:hemi                          | 0.00      | 0.00     | 1.00  | 100584.02 | 0.00    | 0.998  | 0.000   |
| Congruity:hemi                      | 7.50      | 3.75     | 2.00  | 100584.02 | 0.05    | 0.955  | 0.001   |
| pair:hemi                           | 9382.26   | 1876.45  | 5.00  | 100584.02 | 22.78   | 0.000  | 0.034   |
| Magnitude:Ratio:Congruity           | 85.50     | 42.75    | 2.00  | 100585.26 | 0.52    | 0.595  | 0.003   |
| Magnitude:Ratio:pair                | 29.41     | 5.88     | 5.00  | 100584.02 | 0.07    | 0.996  | 0.002   |
| Magnitude:Congruity:pair            | 759.81    | 75.98    | 10.00 | 100584.02 | 0.92    | 0.511  | 0.010   |
| Ratio:Congruity:pair                | 816.10    | 81.61    | 10.00 | 100584.02 | 0.99    | 0.449  | 0.010   |
| Magnitude:Ratio:hemi                | 0.94      | 0.94     | 1.00  | 100584.02 | 0.01    | 0.915  | 0.000   |
| Magnitude:Congruity:hemi            | 6.69      | 3.35     | 2.00  | 100584.02 | 0.04    | 0.960  | 0.001   |
| Ratio:Congruity:hemi                | 2.13      | 1.06     | 2.00  | 100584.02 | 0.01    | 0.987  | 0.001   |
| Magnitude:pair:hemi                 | 35.50     | 7.10     | 5.00  | 100584.02 | 0.09    | 0.994  | 0.002   |
| Ratio:pair:hemi                     | 57.44     | 11.49    | 5.00  | 100584.02 | 0.14    | 0.983  | 0.003   |
| Congruity:pair:hemi                 | 13.12     | 1.31     | 10.00 | 100584.02 | 0.02    | 1.000  | 0.001   |
| Magnitude:Ratio:Congruity:pair      | 224.52    | 22.45    | 10.00 | 100584.02 | 0.27    | 0.987  | 0.005   |
| Magnitude:Ratio:Congruity:hemi      | 330.37    | 165.18   | 2.00  | 100584.02 | 2.01    | 0.135  | 0.006   |
| Magnitude:Ratio:pair:hemi           | 34.22     | 6.84     | 5.00  | 100584.02 | 0.08    | 0.995  | 0.002   |
| Magnitude:Congruity:pair:hemi       | 155.46    | 15.55    | 10.00 | 100584.02 | 0.19    | 0.997  | 0.004   |
| Ratio:Congruity:pair:hemi           | 64.52     | 6.45     | 10.00 | 100584.02 | 0.08    | 1.000  | 0.003   |
| Magnitude:Ratio:Congruity:pair:hemi | 39.71     | 3.97     | 10.00 | 100584.02 | 0.05    | 1.000  | 0.002   |
